# Supplementary material
Source: Springer Nature journal article supplement (https://www.springermedizin.de/resource/supplementary/13054_2007_6312_MOESM2_ESM.pdf/9727180)
Supplement: MOESM2 [file 9727180]

**Timeline of the audit of drotrecogin alfa (activated) and other key events**

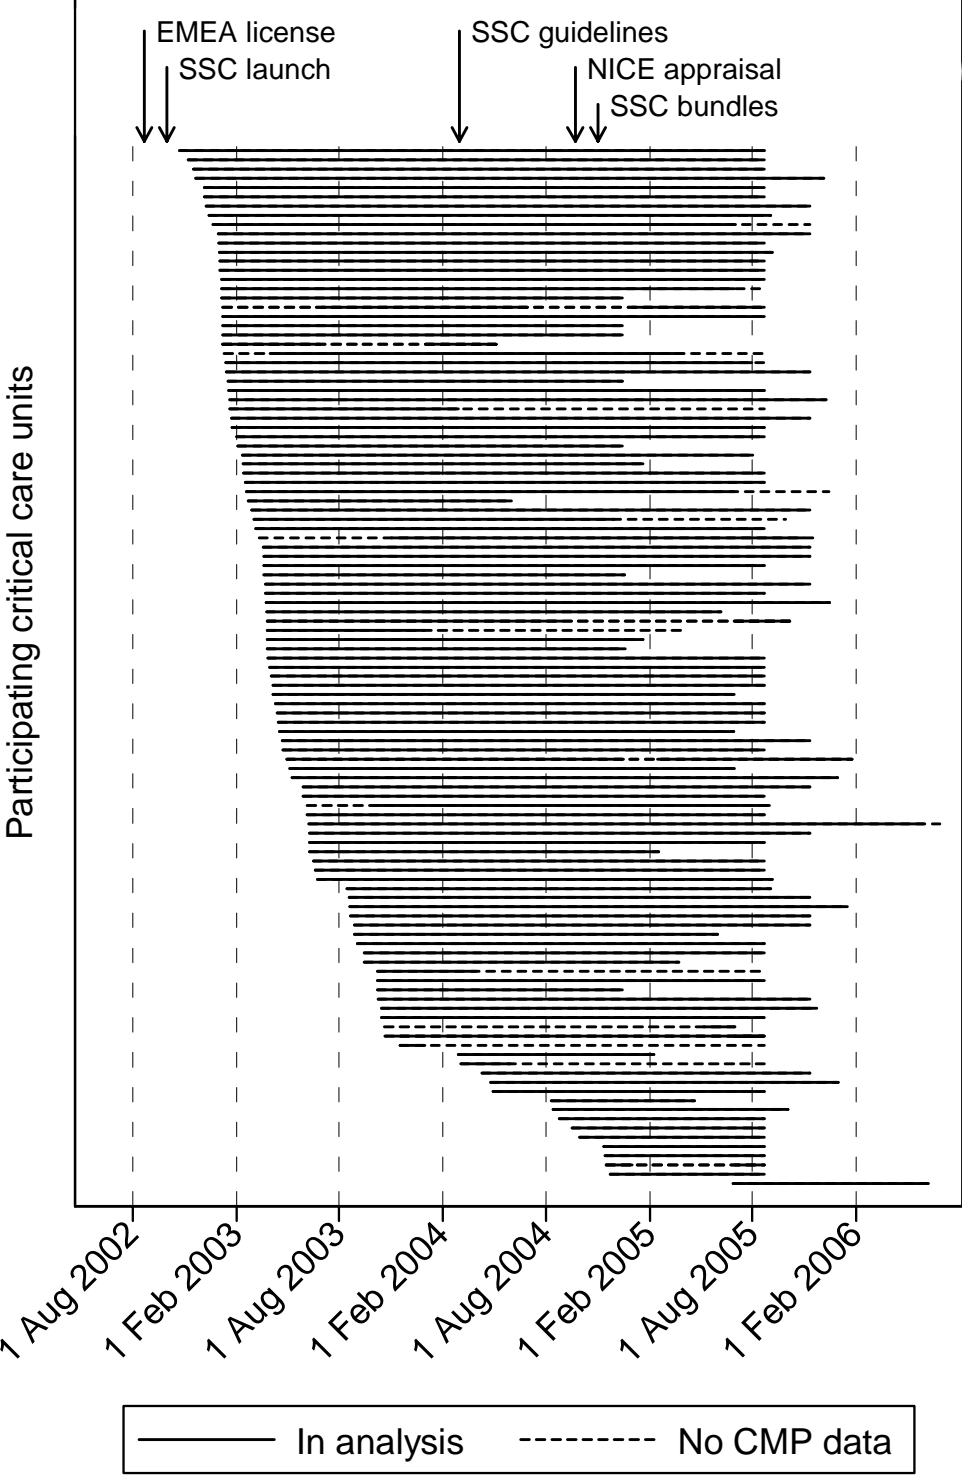

CMP, Case Mix Programme; EMEA, European Agency for the Evaluation of Medicinal Products; NICE, National Institute for Health and Clinical Excellence; SSC, Surviving Sepsis Campaign.
